# Supplementary material for: The first colorimetric receptor for the B4O72− anion based on nitro substituted phenanthroimidazole ferrocene derivatives
Source: Royal Society of Chemistry journal article supplement (doi:10.1039/c7ra12700f), 2018-01-01
Supplement: c7ra12700f1.pdf [file c7ra12700f1.pdf]

## Electronic Supplementary Information

# The first colorimetric receptor for the $B_4O_7^{2-}$ anion based on nitro substituted phenanthroimidazole ferrocene derivatives

Pei Wu, Guo Wang, Lu Zhou, Jing Lu and Jianchun Wang\*

Department of Chemistry, Capital Normal University, Beijing, 100048, PR China

\*Corresponding Author, tel.: +86-010-68902974, e-mail: [cnuwjc@cnu.edu.cn](mailto:cnuwjc@cnu.edu.cn).

### Table of Contents

1. Benesi-Hildebrand plots
2. Crystal data for compound 2a.
3.  $^1H$  NMR and  $^{13}C$  NMR spectra for 2b-2d.
4. HRMS (Thermo Q Exactive) spectra for 2b-2d.

## 1. Benesi-Hildebrand plots

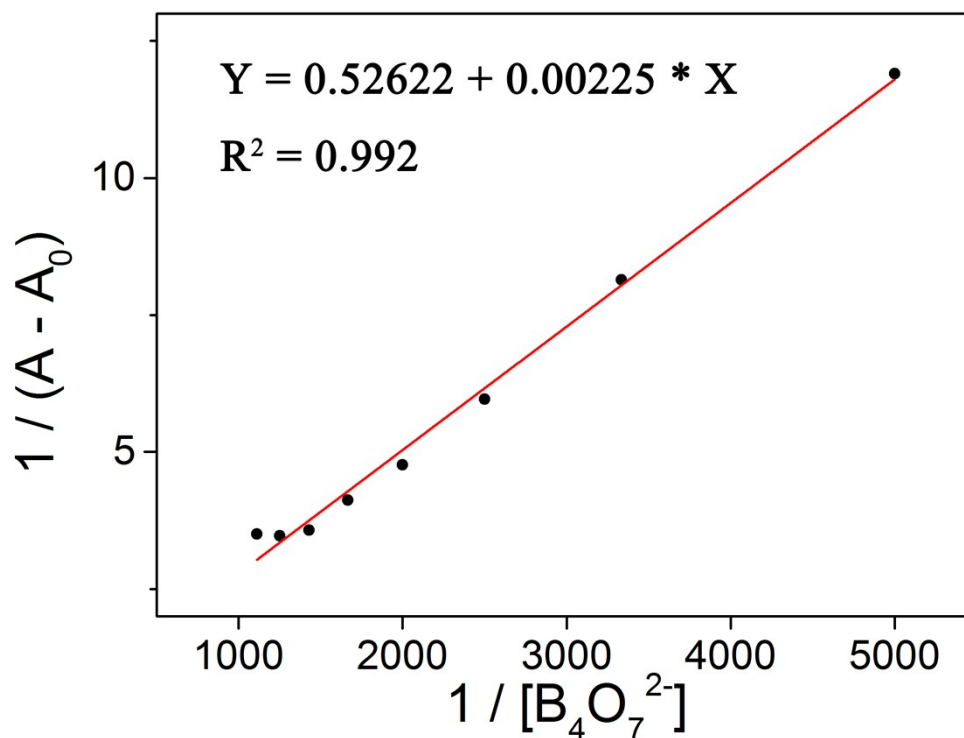

Figure S1. Benesi-Hildebrand analysis of **2b** at different B<sub>4</sub>O<sub>7</sub><sup>2-</sup> concentrations.

## 2. Crystal data for compound 2a

Table S1 Crystal data and structural refinement for **2a**

| Complex                                  | <b>2a</b>                                        |
|------------------------------------------|--------------------------------------------------|
| Formula                                  | C <sub>25</sub> H <sub>18</sub> FeN <sub>2</sub> |
| Crystal system                           | Orthorhombic                                     |
| Space group                              | C222(1)                                          |
| <i>a</i> (Å)                             | 9.746(2)                                         |
| <i>b</i> (Å)                             | 19.123(4)                                        |
| <i>c</i> (Å)                             | 19.154(4)                                        |
| <i>α</i> (°)                             | 90.00                                            |
| <i>β</i> (°)                             | 90.00                                            |
| <i>γ</i> (°)                             | 90.00                                            |
| <i>V</i> (Å <sup>3</sup> )               | 3750.1(13)                                       |
| <i>Z</i>                                 | 8                                                |
| <i>F</i> (000)                           | 1664                                             |
| Reflections collected                    | 5997                                             |
| Independent reflections                  | 22915                                            |
| Goodness-of-fit on <i>F</i> <sup>2</sup> | 1.003                                            |
| R(reflections)                           | 0.0541(4640)                                     |
| wR2(reflections)                         | 0.1207(5921)                                     |

**Table S2** Selected bond length (Å) and bond angles (°) in **2a**

| bond(Å)          | angle(°)   | bond(Å)          | angle(°)   | bond(Å)          | angle(°)   |
|------------------|------------|------------------|------------|------------------|------------|
| Fe(1)—C(6)       | 2.043(3)   | Fe(1)—C(3)       | 2.044(3)   | Fe(1)—C(9)       | 2.045(3)   |
| Fe(1)—C(9)       | 2.046(3)   | Fe(1)—C(4)       | 2.047(3)   | Fe(1)—C(7)       | 2.050(3)   |
| Fe(1)—C(1)       | 2.055(3)   | Fe(1)—C(8)       | 2.056(3)   | Fe(1)—C(5)       | 2.056(3)   |
| Fe(1)—C(10)      | 2.059(3)   | N(1)—C(11)       | 1.353(4)   | N(1)—C(12)       | 1.393(4)   |
| N(2)—C(11)       | 1.356(4)   | N(2)—C(25)       | 1.398(4)   | C(1)—C(2)        | 1.403(5)   |
| N(1)—C(13)       | 1.311(8)   | N(1)—C(14)       | 1.394(4)   | C(3)—C(4)        | 1.416(5)   |
| C(1)—C(5)        | 1.411(5)   | C(2)—C(3)        | 1.408(5)   | C(3)—C(4)        | 1.416(5)   |
| C(4)—C(5)        | 1.406(5)   | C(6)—C(7)        | 1.419(4)   | C(6)—C(10)       | 1.432(4)   |
| C(7)—C(8)        | 1.448(4)   | C(7)—C(11)       | 1.460(4)   | C(8)—C(9)        | 1.420(4)   |
| C(9)—C(10)       | 1.414(5)   | C(12)—C(25)      | 1.374(4)   | C(12)—C(13)      | 1.441(4)   |
| C(13)—C(14)      | 1.415(4)   | C(13)—C(18)      | 1.419(4)   | C(14)—C(15)      | 1.377(5)   |
| C(15)—C(16)      | 1.393(5)   | C(16)—C(17)      | 1.361(5)   | C(17)—C(18)      | 1.410(4)   |
| C(18)—C(19)      | 1.480(5)   | C(19)—C(20)      | 1.415(4)   | C(19)—C(24)      | 1.417(4)   |
| C(20)—C(21)      | 1.372(5)   | C(21)—C(22)      | 1.405(5)   | C(22)—C(23)      | 1.373(5)   |
| C(23)—C(24)      | 1.422(4)   | C(24)—C(25)      | 1.429(4)   | C(6)—Fe(1)—C(3)  | 156.85(14) |
| C(6)—Fe(1)—C(9)  | 68.17(12)  | C(3)—Fe(1)—C(9)  | 125.26(14) | C(6)—Fe(1)—C(4)  | 160.93(13) |
| C(3)—Fe(1)—C(4)  | 40.52(15)  | C(9)—Fe(1)—C(4)  | 107.99(13) | C(6)—Fe(1)—C(7)  | 40.60(11)  |
| C(3)—Fe(1)—C(7)  | 121.88(13) | C(9)—Fe(1)—C(7)  | 68.38(11)  | C(4)—Fe(1)—C(7)  | 157.18(13) |
| C(6)—Fe(1)—C(2)  | 121.62(14) | C(3)—Fe(1)—C(2)  | 40.23(15)  | C(9)—Fe(1)—C(2)  | 161.95(14) |
| C(4)—Fe(1)—C(2)  | 67.83(14)  | C(7)—Fe(1)—C(2)  | 108.24(13) | C(6)—Fe(1)—C(1)  | 108.15(13) |
| C(3)—Fe(1)—C(1)  | 67.33(14)  | C(9)—Fe(1)—C(1)  | 156.45(13) | C(4)—Fe(1)—C(1)  | 67.45(13)  |
| C(7)—Fe(1)—C(1)  | 124.96(12) | C(2)—Fe(1)—C(1)  | 39.97(14)  | C(6)—Fe(1)—C(8)  | 68.89(12)  |
| C(3)—Fe(1)—C(8)  | 107.97(14) | C(9)—Fe(1)—C(8)  | 40.52(12)  | C(4)—Fe(1)—C(8)  | 121.18(13) |
| C(7)—Fe(1)—C(8)  | 41.32(11)  | C(2)—Fe(1)—C(8)  | 125.26(14) | C(1)—Fe(1)—C(8)  | 161.96(13) |
| C(6)—Fe(1)—C(5)  | 124.63(13) | C(3)—Fe(1)—C(5)  | 67.60(14)  | C(9)—Fe(1)—C(5)  | 121.40(12) |
| C(4)—Fe(1)—C(5)  | 40.08(14)  | C(7)—Fe(1)—C(5)  | 161.25(12) | C(2)—Fe(1)—C(5)  | 67.55(14)  |
| C(1)—Fe(1)—C(5)  | 40.15(13)  | C(8)—Fe(1)—C(5)  | 156.11(13) | C(6)—Fe(1)—C(10) | 40.87(12)  |
| C(3)—Fe(1)—C(10) | 161.21(14) | C(9)—Fe(1)—C(10) | 169.8(3)   | C(4)—Fe(1)—C(10) | 124.17(13) |
| C(7)—Fe(1)—C(10) | 68.59(11)  | C(2)—Fe(1)—C(10) | 156.66(14) | C(1)—Fe(1)—C(10) | 121.58(14) |
| C(8)—Fe(1)—C(10) | 68.61(13)  | C(5)—Fe(1)—C(10) | 107.60(13) | C(11)—N(1)—C(12) | 104.6(2)   |
| C(1)—N(2)—C(25)  | 104.8(2)   | C(2)—C(1)—C(5)   | 108.4(3)   | C(2)—C(1)—Fe(1)  | 69.85(18)  |
| C(5)—C(1)—Fe(1)  | 69.96(18)  | C(1)—C(2)—C(3)   | 107.9(3)   | C(1)—C(2)—Fe(1)  | 70.18(18)  |
| C(3)—C(2)—Fe(1)  | 69.64(18)  | C(2)—C(3)—C(4)   | 108.0(3)   | C(2)—C(3)—Fe(1)  | 70.13(19)  |
| C(4)—C(3)—Fe(1)  | 69.82(18)  | C(5)—C(4)—C(3)   | 107.8(3)   | C(5)—C(4)—Fe(1)  | 70.32(18)  |
| C(3)—C(4)—Fe(1)  | 69.66(19)  | C(4)—C(5)—C(1)   | 107.9(3)   | C(4)—C(5)—Fe(1)  | 69.59(18)  |
| C(1)—C(5)—Fe(1)  | 69.89(18)  | C(7)—C(6)—C(10)  | 108.5(3)   | C(7)—C(6)—Fe(1)  | 69.86(16)  |
| C(10)—C(6)—Fe(1) | 70.15(16)  | C(6)—C(7)—C(8)   | 107.9(3)   | C(6)—C(7)—C(11)  | 126.9(3)   |
| C(8)—C(7)—C(11)  | 125.0(3)   | C(6)—C(7)—Fe(1)  | 69.54(16)  | C(8)—C(7)—Fe(1)  | 69.65(15)  |
| C(11)—C(7)—Fe(1) | 123.22(19) | C(9)—C(8)—C(7)   | 106.6(3)   | C(9)—C(8)—Fe(1)  | 69.34(16)  |
| C(7)—C(8)—Fe(1)  | 69.03(15)  | C(10)—C(9)—C(8)  | 109.8(3)   | C(10)—C(9)—Fe(1) | 70.35(16)  |
| C(8)—C(9)—Fe(1)  | 70.14(16)  | C(9)—C(10)—C(6)  | 107.2(3)   | C(9)—C(10)—Fe(1) | 69.33(17)  |

---

|                   |           |                   |          |                   |           |
|-------------------|-----------|-------------------|----------|-------------------|-----------|
| C(6)—C(10)—Fe(1)  | 68.98(16) | N(1)—C(11)—N(2)   | 113.4(3) | N(1)—C(11)—C(7)   | 124.6(3)  |
| N(2)—C(11)—C(7)   | 122.0(3)  | C(25)—C(12)—N(1)  | 109.1(3) | C(25)—C(12)—C(3)  | 121.9(3)  |
| N(1)—C(12)—C(13)  | 129.0(3)  | C(14)—C(13)—C(18) | 120.0(3) | C(14)—C(13)—C(12) | 122.6(3)  |
| C(18)—C(13)—C(12) | 117.4(3)  | C(15)—C(14)—C(13) | 120.0(3) | C(14)—C(15)—C(16) | 68.98(16) |
| C(14)—C(13)—C(12) | 122.0(3)  | C(14)—C(13)—C(12) | 122.0(3) | C(14)—C(13)—C(12) | 120.0(3)  |
| C(17)—C(16)—C(15) | 120.9(3)  | C(16)—C(17)—C(18) | 121.5(3) | C(17)—C(18)—C(13) | 117.6(3)  |
| C(17)—C(18)—C(19) | 122.1(3)  | C(13)—C(18)—C(19) | 120.2(3) | C(20)—C(19)—C(24) | 118.0(3)  |
| C(20)—C(19)—C(18) | 121.9(3)  | C(24)—C(19)—C(18) | 120.1(3) | C(21)—C(20)—C(19) | 121.2(3)  |
| C(20)—C(21)—C(22) | 120.5(3)  | C(23)—C(22)—C(21) | 120.2(3) | C(22)—C(23)—C(24) | 120.0(3)  |
| C(19)—C(24)—C(23) | 120.0(3)  | C(19)—C(24)—C(25) | 117.6(3) | C(23)—C(24)—C(25) | 122.4(3)  |
| C(12)—C(25)—N(2)  | 108.1(2)  | C(12)—C(25)—C(24) | 122.7(3) | N(2)—C(25)—C(24)  | 129.2(3)  |

---

### 3. $^1\text{H}$ NMR and $^{13}\text{C}$ NMR spectra for 2b-2d

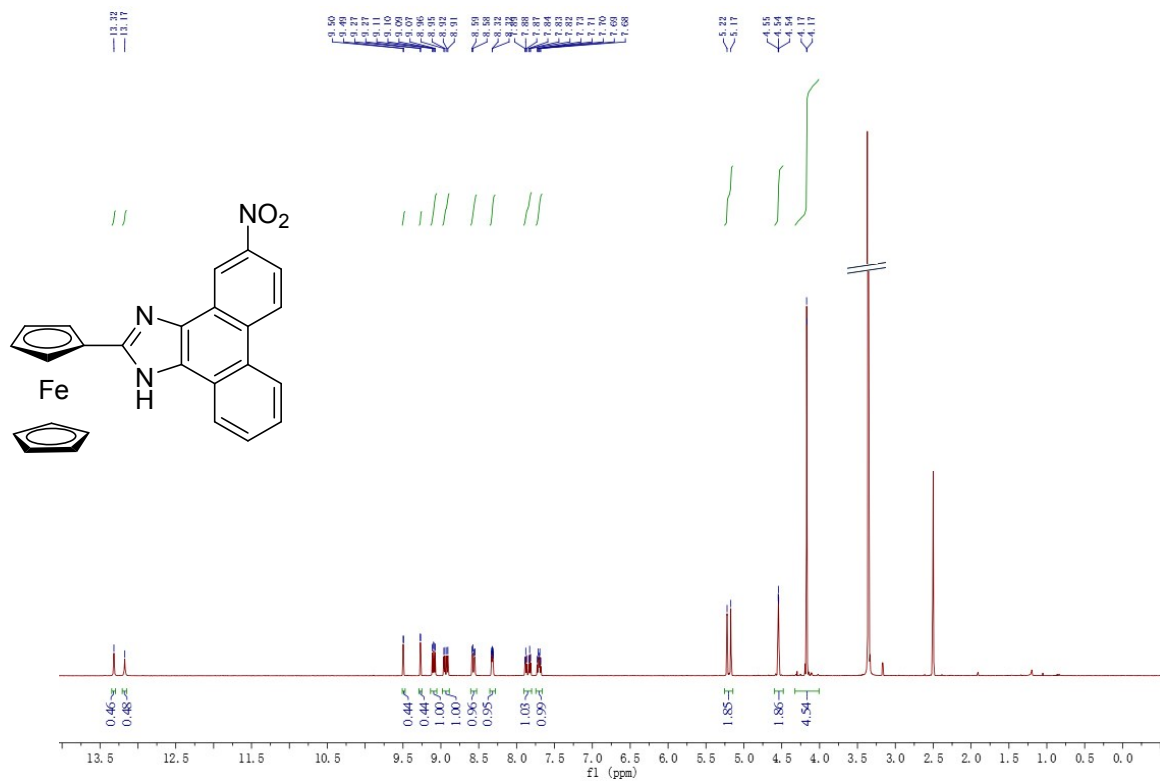

Fig. S2  $^1\text{H}$  NMR spectrum of compound 2b.

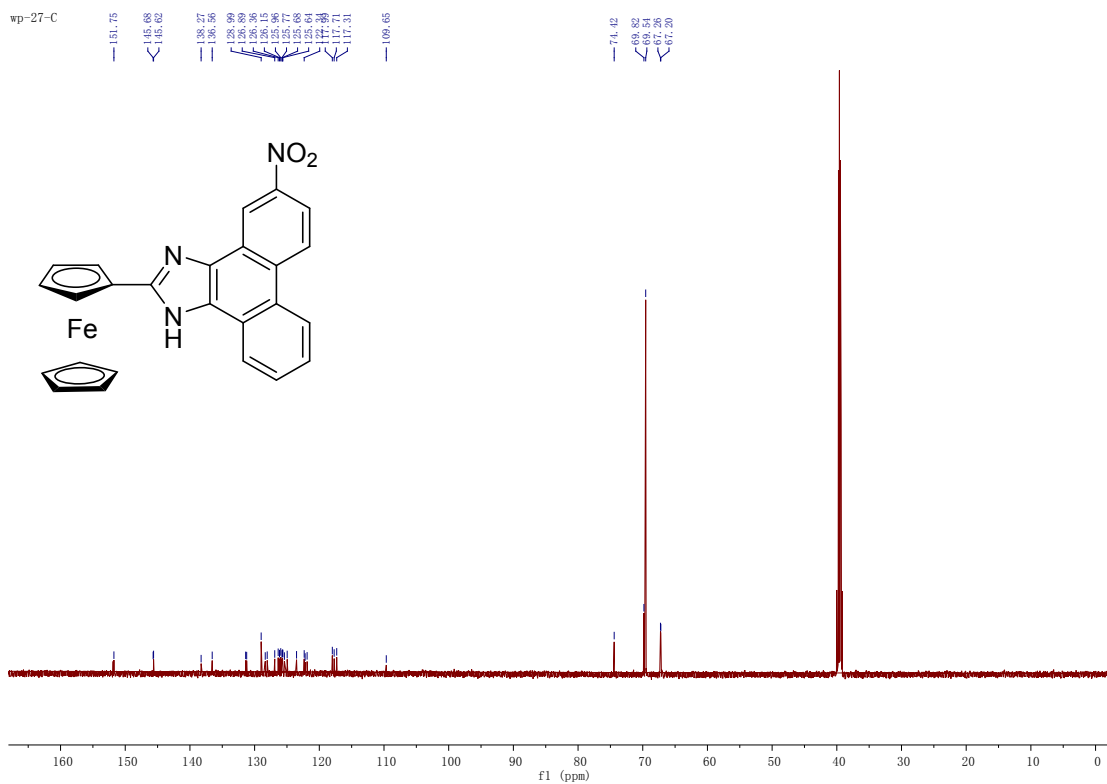

Fig. S3  $^{13}\text{C}$  NMR spectrum of compound 2b.

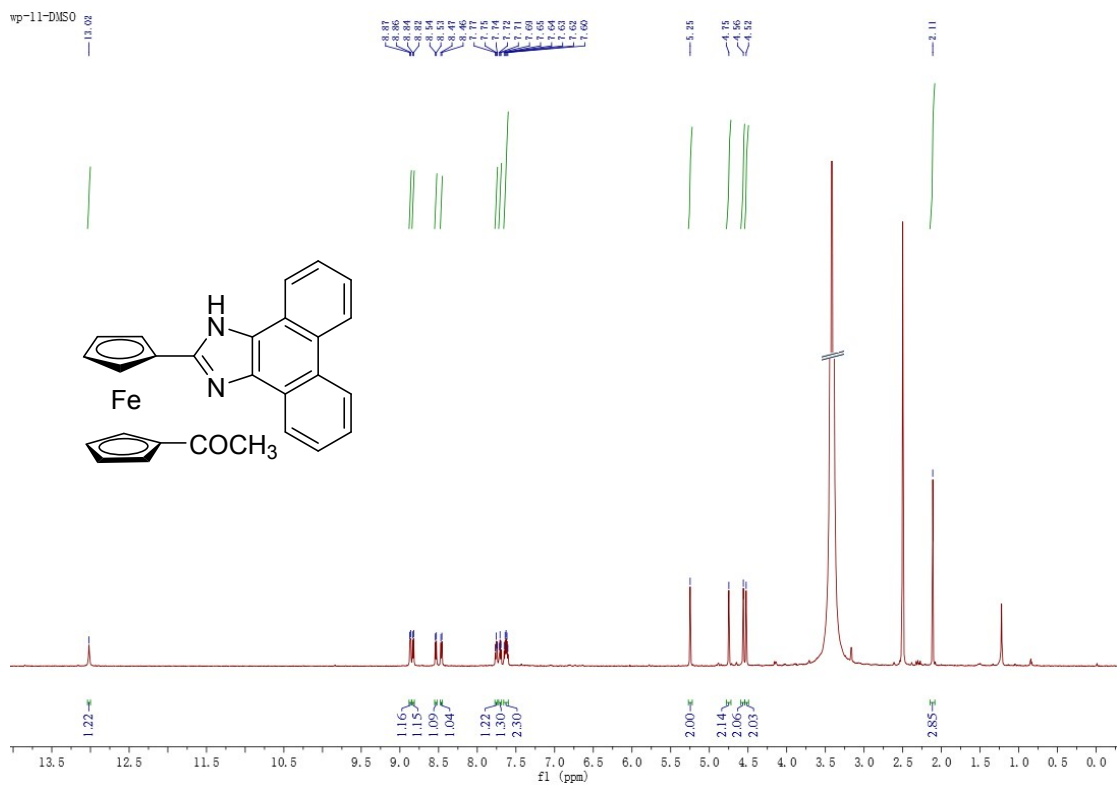

Fig. S4  $^1\text{H}$  NMR spectrum of compound 2c.

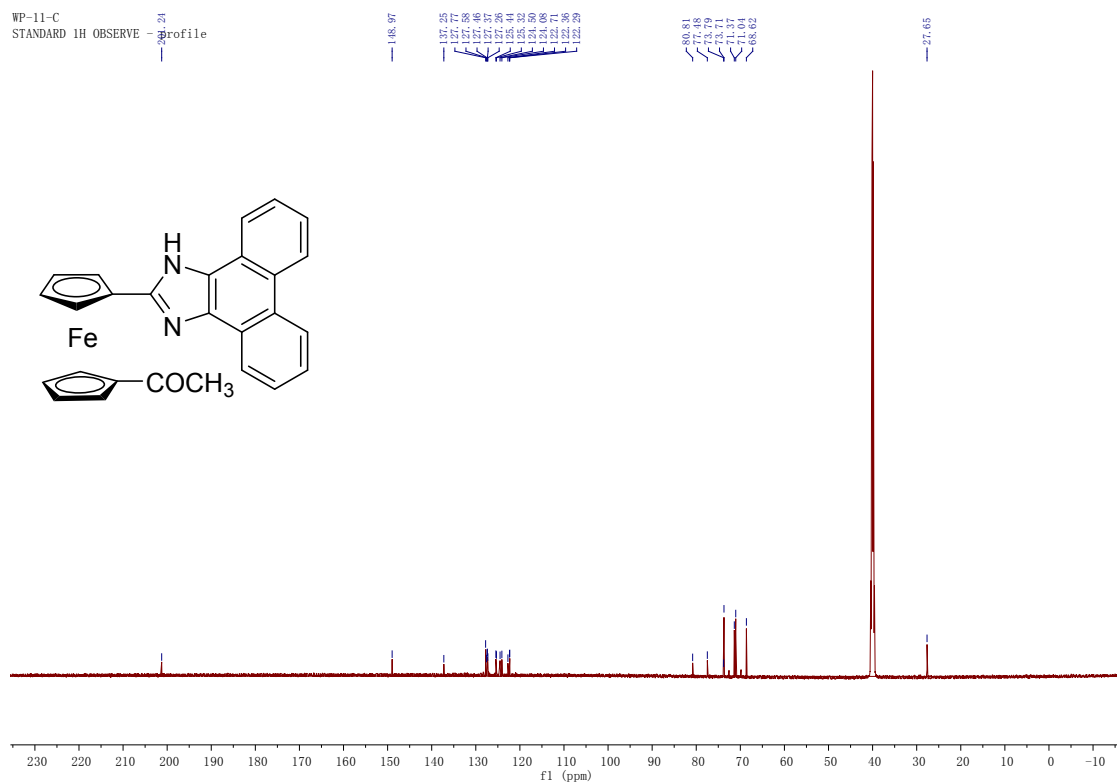

Fig. S5  $^{13}\text{C}$  NMR spectrum of compound 2c.



#### 4. HRMS (Thermo Q Exactive) spectra for 2b-2d.

##### HIGH RESOLUTION MASS SPECTROMETRY REPORT

| Sample No. | Formula (M)                                                     | Ion Formula        | Measured m/z | Calc m/z | Diff. (ppm) |
|------------|-----------------------------------------------------------------|--------------------|--------------|----------|-------------|
| <b>2b</b>  | C <sub>25</sub> H <sub>17</sub> FeN <sub>3</sub> O <sub>2</sub> | [M+H] <sup>+</sup> | 448.0730     | 448.0743 | 2.90        |

WP-27 #361 RT: 3.58 AV: 1 NL: 6.65E9  
T: FTMS + p ESI Full ms [100.00-1500.00]

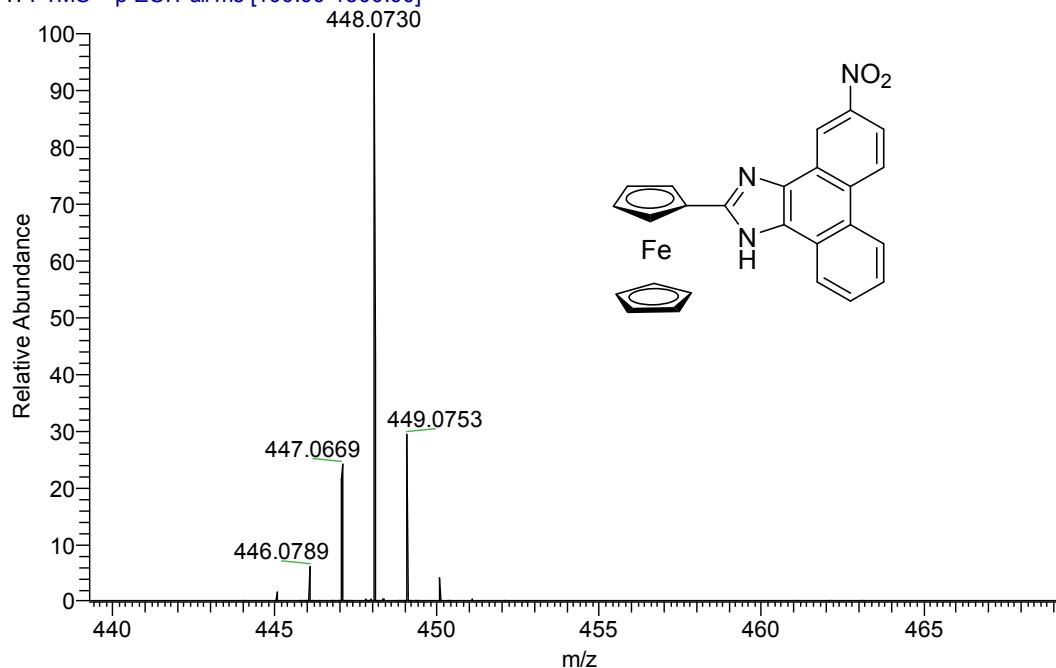

**Fig. S8** HRMS data of compound **2b**. HIGH RESOLUTION MASS SPECTROMETRY REPORT

| Sample No. | Formula (M)                                      | Ion Formula        | Measured m/z | Calc m/z | Diff. (ppm) |
|------------|--------------------------------------------------|--------------------|--------------|----------|-------------|
| <b>2c</b>  | C <sub>25</sub> H <sub>18</sub> FeN <sub>2</sub> | [M+H] <sup>+</sup> | 445.0997     | 445.0998 | 2.25        |

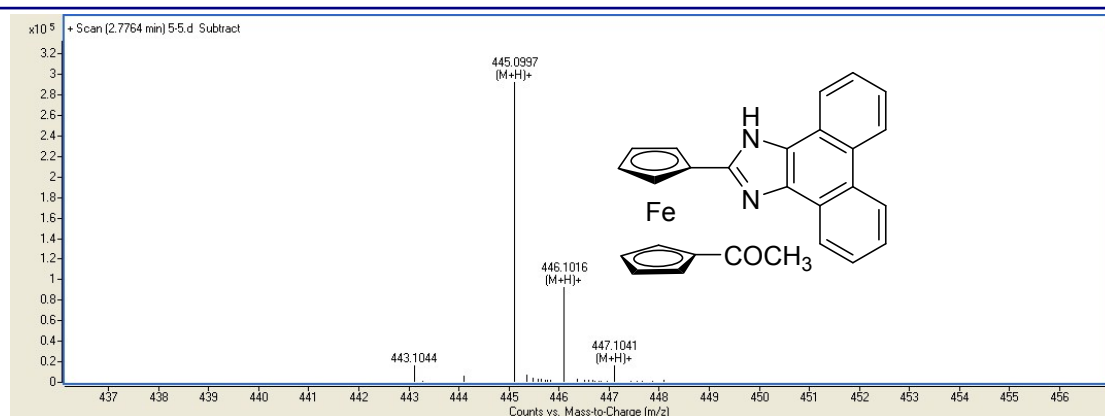

**Fig. S9** HRMS results of compound **2c**.



## HIGH RESOLUTION MASS SPECTROMETRY REPORT

| Sample No. | Formula (M)            | Ion Formula | Measured m/z | Calc m/z | Diff. (ppm) |
|------------|------------------------|-------------|--------------|----------|-------------|
| <b>2d</b>  | $C_{27}H_{19}FeN_3O_3$ | $[M+H]^+$   | 490.0845     | 490.0849 | 0.82        |

WP-30 #365 RT: 3.62 AV: 1 NL: 9.60E8  
 T: FTMS + p ESI Full ms [100.00-1500.00]

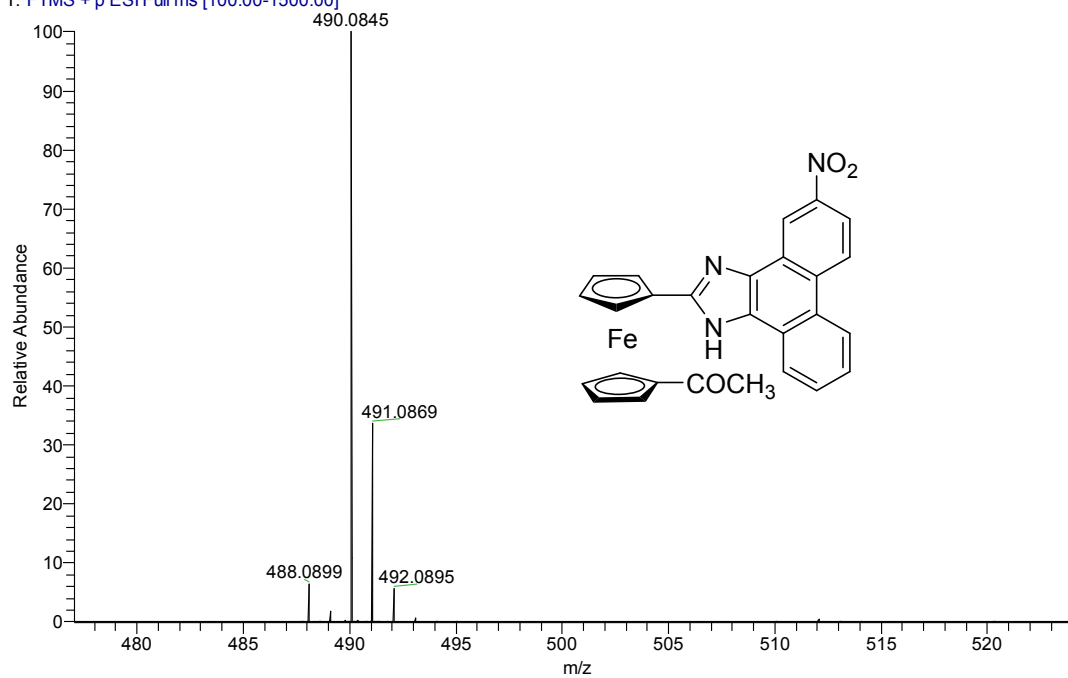

**Fig. S10**  
 HRMS results of compound **2d**.
